# Supplementary material for: Amyloid-β targeting immunisation in aged non-human primate (Microcebus murinus)
Source: bioRxiv or medRxiv preprint supplement (doi:10.1101/2022.08.05.502918), 2022-08-05
Supplement: Supplementary file [file media-1.pdf]

Supplementary data

adjuvant animals

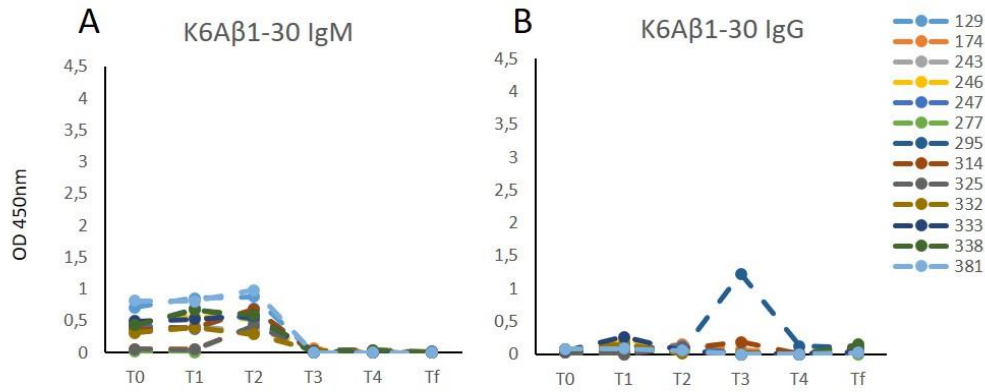

K6Aβ1-30 animals

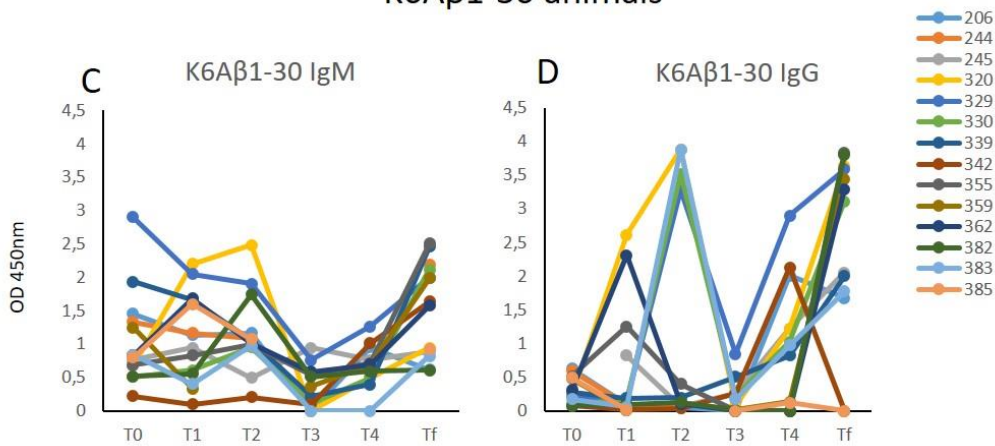

**Figure 1 Suppl: Individual antibody response in adjuvant treated (A, B) and K6Aβ1-30 treated (C, D) mouse lemurs. K6Aβ1-30 IgM (A,C) and K6Aβ1-30 IgG (B,D)** The y-axis depicts the absorbance at 450 nm of antibodies bound to K6Aβ1-30 coated onto the plates. Animals with limited blood samples are not included ( $n=3$  and  $n=2$  for adjuvant- and K6Aβ1-30 treated animals, respectively). The legend shows the assigned animal numbers.

### adjuvant animals

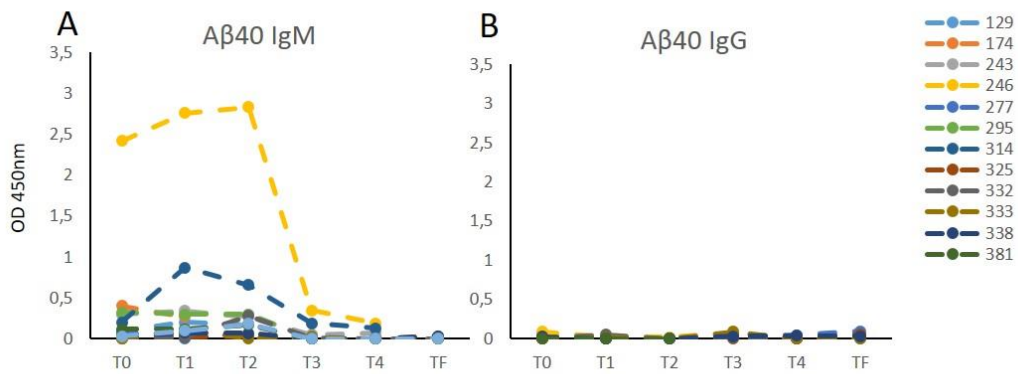

### K6Aβ1-30 animals

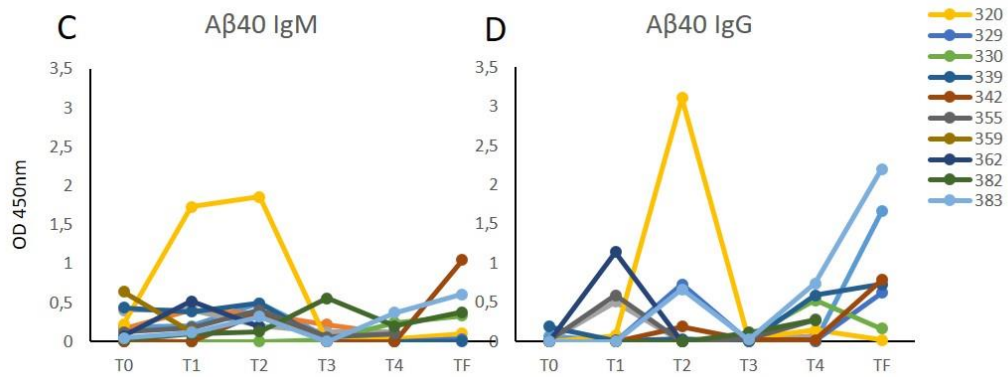

**Figure 2 Suppl: Individual antibody Response in adjuvant treated (A, B) and K6Aβ1-30 treated (C, D) mouse lemurs. Aβ40 IgM (A,C) and Aβ40 IgG (B,D)** The y-axis depicts the absorbance at 450 nm of antibodies bound to Aβ1-40 coated onto the plates. Animals with limited blood samples are not included (n=4 and n=3 for adjuvant- and K6Aβ1-30 treated animals, respectively). The legend shows the assigned animal numbers.
